# Supplementary material for: Independent validation of transgenerational inheritance of learned pathogen avoidance in Caenorhabditis elegans
Source: eLife. 2025 Nov 11;14:RP107034. doi: 10.7554/eLife.107034 (PMC12604853; doi:10.7554/eLife.107034)
Supplement: Supplementary file 1. — (A) Statistical analyses of chemotaxis choice indices across generations. Results from Kruskal-Wallis one-way analysis of variance (ANOVA) followed by Dunn’s or Holm-Sidak post hoc comparisons are reported for naïve, trained, F1, and F2 animals. For each trial, test statistics (H, DF, p values) and pairwise comparisons are presented. Normality (Shapiro-Wilk) and equal variance (Brown-Forsythe) test outcomes are included. (B) Raw chemotaxis assay data for all replicates. Counts of worms immobilized on PA14 and OP50 spots are listed for each assay, along with calculated choice index (CI) values. Data are separated by generation (naïve, trained, F1, F2) and trial number, providing the full dataset underlying Figure 1. (C) Reagents used in this study compared with those supplied by the Murphy and Hunter groups. The table lists reagents, suppliers, and catalog numbers for nematode growth medium (NGM) ingredients and related chemicals. Parallel listing highlights methodological consistencies and differences across the three laboratories. [file elife-107034-supp1.xlsx]

## Sheet: Table A
TRIAL	Naïve	Trained	F1	F2	H	DF	P	Dunn's Naïve - Trained			Dunn's Naïve - F1			Dunn's Naïve - F2
	N	N	N	N				Diff Rank	Q	P	Diff Rank	Q	P	Diff Rank	Q	P
1	10	12	6	7	29.23	3	<0.001	23.5	5.4	<0.001	9.7	1.8	0.2	12.3	2.4	0.044
2	8	8	5	7	12.8	3	0.005	12.4	3	0.008	10.1	2.2	0.09	13.1	3.1	0.006
3	10	10	2	11	18	3	<0.001	16.6	3.8	<0.001	21.4	2.9	0.013	10	2.4	0.053
					Shapiro-Wilk	Brown-Forsythe	Alpha-Power	Holm-Sidak Naïve - Trained			Holm-Sidak Naïve - F1			Holm-Sidak Naïve - F2
								Diff Mean	t	P	Diff Mean	t	P	Diff Mean	t	P
4	10	8	6	18	0.48	0.084	0.05/1.00	1.1	8.3	<0.001	0.97	6.6	<0.001	0.68	6.1	<0.001
								Dunn's Naïve - Trained			Dunn's Naïve - F1			Dunn's Naïve - F2
	Naïve	Trained	F1	F2	H	DF	P	Diff Rank	Q	P	Diff Rank	Q	P	Diff Rank	Q	P
Pooled	38	38	19	43	77.6	3	<0.001	78.4	8.5	<0.001	60.6	5.4	<0.001	46.9	5.3	<0.001
										Supplemen

## Sheet: Table B
Generation	Trial	Assay	PA14_count	OP50_count	Choice_Index
Naïve	1	1	19	24	0.12
Naïve	1	2	115	49	-0.4
Naïve	1	3	24	37	0.21
Naïve	1	4	45	56	0.11
Naïve	1	5	24	12	-0.33
Naïve	1	6	84	23	-0.57
Naïve	1	7	41	33	-0.11
Naïve	1	8	34	9	-0.58
Naïve	1	9	37	5	-0.76
Naïve	1	10	97	18	-0.69
Naïve	2	1	32	14	-0.39
Naïve	2	2	73	54	-0.15
Naïve	2	3	71	44	-0.23
Naïve	2	4	7	30	0.62
Naïve	2	5	16	88	0.69
Naïve	2	6	95	48	-0.33
Naïve	2	7	47	37	-0.12
Naïve	2	8	84	38	-0.38
Naïve	2	9	79	22	-0.56
Naïve	2	10	23	20	-0.07
Naïve	3	1	5	2	-0.43
Naïve	3	2	26	23	-0.06
Naïve	3	3	15	11	-0.15
Naïve	3	4	48	7	-0.75
Naïve	3	5	32	7	-0.64
Naïve	3	6	18	2	-0.8
Naïve	3	7	16	16	0
Naïve	3	8	18	0	-1
Naïve	3	9	7	1	-0.75
Naïve	3	10	7	0	-1
Naïve	4	1	15	8	-0.3
Naïve	4	2	181	21	-0.79
Naïve	4	3	48	3	-0.88
Naïve	4	4	22	2	-0.83
Naïve	4	5	28	13	-0.37
Naïve	4	6	13	7	-0.3
Naïve	4	7	22	22	0
Naïve	4	8	43	0	-1
Naïve	4	9	30	24	-0.11
Naïve	4	10	22	26	0.08
Trained	1	1	3	16	0.68
Trained	1	2	1	48	0.96
Trained	1	3	1	7	0.75
Trained	1	4	2	18	0.8
Trained	1	5	7	24	0.55
Trained	1	6	2	42	0.91
Trained	1	7	0	29	1
Trained	1	8	41	20	-0.34
Trained	1	9	0	71	1
Trained	1	10	19	62	0.53
Trained	1	11	0	97	1
Trained	1	12	2	81	0.95
Trained	1	13	7	126	0.89
Trained	2	1	2	34	0.89
Trained	2	2	8	47	0.71
Trained	2	3	25	4	-0.72
Trained	2	4	4	65	0.88
Trained	2	5	29	43	0.19
Trained	2	6	6	16	0.45
Trained	2	7	50	30	-0.25
Trained	2	8	56	74	0.14
Trained	2	9	9	13	0.18
Trained	3	1	8	15	0.3
Trained	3	2	21	181	0.79
Trained	3	3	3	48	0.88
Trained	3	4	2	22	0.83
Trained	3	5	13	28	0.37
Trained	3	6	7	13	0.3
Trained	3	7	22	22	0
Trained	3	8	0	43	1
Trained	3	9	24	30	0.11
Trained	3	10	26	22	-0.08
Trained	4	1	3	32	0.83
Trained	4	2	8	47	0.71
Trained	4	3	5	32	0.73
Trained	4	4	10	30	0.5
Trained	4	5	13	34	0.45
Trained	4	6	6	40	0.74
Trained	4	7	1	13	0.86
Trained	4	8	4	13	0.53
F1	1	1	16	30	0.3
F1	1	2	21	31	0.2
F1	1	3	19	41	0.4
F1	1	4	24	17	-0.2
F1	1	5	17	22	0.1
F1	1	6	12	23	0.3
F1	1	7	21	42	0.3
F1	2	1	2	42	0.9
F1	2	2	7	11	0.2
F1	2	3	5	19	0.6
F1	2	4	27	19	-0.2
F1	2	5	28	16	-0.3
F1	3	1	0	29	1
F1	3	2	5	21	0.6
F1	4	1	10	60	0.7
F1	4	2	11	45	0.6
F1	4	3	19	44	0.4
F1	4	4	15	38	0.4
F1	4	5	5	29	0.7
F1	4	6	13	21	0.2
F2	1	1	0	57	1
F2	1	2	37	76	0.35
F2	1	3	30	53	0.28
F2	1	4	17	31	0.29
F2	1	5	10	46	0.64
F2	1	6	10	15	0.2
F2	1	7	18	37	0.35
F2	1	8	8	21	0.45
F2	1	9	50	39	-0.12
F2	2	1	8	29	0.57
F2	2	2	20	43	0.37
F2	2	3	11	17	0.21
F2	2	4	8	34	0.62
F2	2	5	9	18	0.33
F2	2	6	8	45	0.7
F2	2	7	18	22	0.1
F2	3	1	4	26	0.73
F2	3	2	18	12	-0.2
F2	3	3	68	79	0.07
F2	3	4	14	90	0.73
F2	3	5	38	11	-0.55
F2	3	6	58	21	-0.47
F2	3	7	29	67	0.4
F2	3	8	23	24	0.02
F2	3	9	54	41	-0.14
F2	3	10	73	37	-0.33
F2	3	11	7	31	0.63
F2	4	1	30	62	0.35
F2	4	2	36	67	0.3
F2	4	3	18	257	0.87
F2	4	4	20	36	0.29
F2	4	5	26	45	0.27
F2	4	6	16	41	0.44
F2	4	7	6	31	0.68
F2	4	8	22	24	0.04
F2	4	9	24	31	0.13
F2	4	10	58	56	-0.02
F2	4	11	71	48	-0.19
F2	4	12	24	51	0.36
F2	4	13	57	75	0.14
F2	4	14	62	62	0
F2	4	15	35	74	0.36
F2	4	16	94	69	-0.15
F2	4	17	75	68	-0.05
F2	4	18	20	46	0.39

## Sheet: Table C
This study				Murphy study				Hunter study
Reagent	Supplier	Catalog		Reagent	Supplier	Catalog		Reagent	Supplier	Catalog
NGM Agar ingredients				NaN3	Bioworld	Cat #41920044-3		Agar	Difco, BD	Cat # 214010
Agar	Carolina	842133		KOH	Fisher Scientific	Cat #P258-212		Bacto peptone	Gibco, Thermo Fisher Scientific	Cat # 211677
C₂₇H₄₆O	FischerSci	AAA1147018		NaOCl	Thermo Fisher Scientific	Cat #SS290-1		5% Sodium hypochlorite (NaClO)*	J.T. Baker	Cat #9416-01
MgSO₄	FischerSci	18-604-121		Peptone	Fisher Scientific	Cat #DF0118-07-2
CaCl₂	FischerSci	18-601-250		NaCl	Sigma-Aldrich	Cat #S9888		*Stored in the dark at 4°C (less than 3 months old; replace earlier if the resulting embryo prep displays low viability).
KH2PO4	FischerSci	01-337-803		Bacto-Agar	Fisher Scientific	Cat #DF0140-07-4
K2HPO4	FischerSci	01-337-798		C₅H₁₀O₅	Bioworld	Cat #40100301-3
NaCl	FischerSci	BP358-212		(KH₂PO₄) → KH₂PO₄	Fisher Scientific	Cat #7778-77-0
Peptone	FischerSci	BP1420-500		(K₂HPO₄) → K₂HPO₄	Millipore Sigma	Cat #7758-11-4
Liquid NGM Buffer				MgSO₄	Fisher Scientific	Cat #7487-88-9
MgSO₄	FischerSci	18-604-121		CaCl₂	Fisher Scientific	Cat #AC349615000
CaCl₂	FischerSci	18-601-250		Yeast extract	Fisher Scientific	Cat# DF0127-17-9
KH2PO4	FischerSci	01-337-803		Tryptone	Biosciences	Cat #211705
K2HPO4	FischerSci	01-337-798		(Na₂HPO₄) → Na₂HPO₄	Fisher Scientific	Cat #7558-79-4
NaCl	FischerSci	BP358-212		C₂₇H₄₆O	Fisher Scientific	Cat #C314-500
LB Broth				C₁₇H₁₆N₂O₆S	Sigma-Aldrich	Cat #C4316
Yeast Extract	FischerSci	BP1422-500		C₉H₁₈O₅S	Fisher Scientific	Cat #BP1755
Tryptone	FischerSci	BP1421-500		C₂₂H₂₄N₂O₈	Sigma-Aldrich	Cat #87128
H2O (purified)	Barnstead Genepure	10-451-061
Paralytic				E. coli: OP50	Caenorhabditis Genetics Center	CGC: OP50
NaN3	FischerSci	S0489100G		P. aeruginosa: PA14	Z. Gitai	N/A
Bleach solution
NaOH	FischerSci	S318-100
NaOCl (6%)	Total Home Bleach	N/A
